# Supplementary material for: Epigenetic Studies Point to DNA Replication/Repair Genes as a Basis for the Heritable Nature of Long Term Complications in Diabetes
Source: Hindawi journal article supplement (doi:10.1155/2016/2860780), 2016-01-01
Supplement: f1 [file 2860780.f1.pdf]

**Supplemental Table 1. Genes of the *DNA Replication/DNA Metabolism* Functional Group.**

| ENTREZ<br>ID # | Gene<br>Symbol | Gene Name                                                                                                                                                                                                                                             |
|----------------|----------------|-------------------------------------------------------------------------------------------------------------------------------------------------------------------------------------------------------------------------------------------------------|
| 406730         | apex1          | APEX nuclease (multifunctional DNA repair enzyme) 1                                                                                                                                                                                                   |
| 30430          | dnmt1          | DNA (cytosine-5-)-methyltransferase 1                                                                                                                                                                                                                 |
| 317744         | dnmt4          | DNA (cytosine-5-)-methyltransferase 4                                                                                                                                                                                                                 |
| 321084         | dnmt7          | DNA (cytosine-5-)-methyltransferase 7                                                                                                                                                                                                                 |
| 373130         | dffb           | DNA fragmentation factor, beta polypeptide (caspase-activated DNase)                                                                                                                                                                                  |
| 192338         | mcm2           | MCM2 minichromosome maintenance deficient 2, mitotin (S. cerevisiae)                                                                                                                                                                                  |
| 192323         | mcm3           | MCM3 minichromosome maintenance deficient 3 (S. cerevisiae)                                                                                                                                                                                           |
| 337598         | mcm4           | MCM4 minichromosome maintenance deficient 4, mitotin (S. cerevisiae)                                                                                                                                                                                  |
| 192333         | mcm7           | MCM7 minichromosome maintenance deficient 7 (S. cerevisiae)                                                                                                                                                                                           |
| 317679         | ruvbl1         | RuvB-like 1 (E. coli)                                                                                                                                                                                                                                 |
| 317678         | ruvbl2         | RuvB-like 2 (E. coli)                                                                                                                                                                                                                                 |
| 282615         | smarca5        | SWI/SNF related, matrix associated, actin dependent regulator of chromatin, subfamily a, member 5; similar to SWI/SNF related, matrix associated, actin dependent regulator of chromatin, subfamily a, member 5                                       |
| 326746         | cbx1a          | chromobox homolog 1a (HP1 beta homolog Drosophila)                                                                                                                                                                                                    |
| 83780          | cry2b          | cryptochrome 2b                                                                                                                                                                                                                                       |
| 83774          | cry3           | cryptochrome 3                                                                                                                                                                                                                                        |
| 83776          | cry5           | cryptochrome 5                                                                                                                                                                                                                                        |
| 402986         | cry-dash       | cryptochrome DASH                                                                                                                                                                                                                                     |
| 445395         | esco2          | establishment of cohesion 1 homolog 2 (S. cerevisiae)                                                                                                                                                                                                 |
| 322599         | eif1axb        | eukaryotic translation initiation factor 1A, X-linked, b                                                                                                                                                                                              |
| 386707         | fen1           | flap structure-specific endonuclease 1                                                                                                                                                                                                                |
| 751713         | gtf2h5         | general transcription factor IIH, polypeptide 5 heat shock cognate heat shock cognate 70-kd protein, like; MCM5 minichromosome maintenance deficient 5 (S. cerevisiae); heat shock cognate 70-kd protein; zgc:174006; similar to heat shock protein 8 |
| 30671          | hsp70          |                                                                                                                                                                                                                                                       |
| 406845         | msh2           | mutS homolog 2 (E. coli)                                                                                                                                                                                                                              |
| 260437         | msh6           | mutS homolog 6 (E. coli)                                                                                                                                                                                                                              |
| 556665         | nfia           | nuclear factor I/A                                                                                                                                                                                                                                    |
| 334315         | orc3l          | origin recognition complex, subunit 3-like (yeast)                                                                                                                                                                                                    |
| 324256         | orc6l          | origin recognition complex, subunit 6 homolog-like (yeast)                                                                                                                                                                                            |
| 322059         | pola2          | polymerase (DNA directed), alpha 2                                                                                                                                                                                                                    |
| 30440          | prim1          | primase polypeptide 1; hypothetical protein LOC100149101                                                                                                                                                                                              |
| 30678          | pcna           | proliferating cell nuclear antigen                                                                                                                                                                                                                    |
| 393475         | prmt7          | protein arginine N-methyltransferase 7                                                                                                                                                                                                                |
| 406435         | rfc4           | replication factor C (activator 1) 4                                                                                                                                                                                                                  |
| 327491         | rpa1           | replication protein A1                                                                                                                                                                                                                                |
| 65226          | rpa2           | replication protein A2                                                                                                                                                                                                                                |
| 321726         | rbb4           | retinoblastoma binding protein 4                                                                                                                                                                                                                      |
| 322129         | rbb4l          | retinoblastoma binding protein 4, like                                                                                                                                                                                                                |
| 393195         | rnaseh2a       | ribonuclease H2, subunit A                                                                                                                                                                                                                            |
| 30740          | rrm1           | ribonucleotide reductase M1 polypeptide                                                                                                                                                                                                               |
| 30733          | ?              | ribonucleotide reductase M2 polypeptide                                                                                                                                                                                                               |
| 558344         | ?              | si:ch211-51m24.3                                                                                                                                                                                                                                      |
| 556995         | 35b8.5         | si:dkeyp-35b8.5                                                                                                                                                                                                                                       |
| 553496         | top1l          | topoisomerase (DNA) I, like                                                                                                                                                                                                                           |
| 569877         | top2b          | topoisomerase (DNA) II beta                                                                                                                                                                                                                           |
| 393313         | ube2nl         | ubiquitin-conjugating enzyme E2N-like                                                                                                                                                                                                                 |
| 445317         | zgc:101000     | zgc:101000                                                                                                                                                                                                                                            |
| 794796         | zgc:101072     | zgc:101072                                                                                                                                                                                                                                            |
| 494100         | zgc:101644     | zgc:101644                                                                                                                                                                                                                                            |
| 678521         | zgc:136878     | zgc:136878                                                                                                                                                                                                                                            |
| 393196         | zgc:56310      | zgc:56310                                                                                                                                                                                                                                             |
| 406546         | zgc:77429      | zgc:77429                                                                                                                                                                                                                                             |
| 406462         | zgc:85772      | zgc:85772                                                                                                                                                                                                                                             |
